# Supplementary material for: Late effects in survivors of infant acute lymphoblastic leukaemia—a study of the Australian and New Zealand Children’s Haematology/Oncology Group
Source: PubMed Central journal article supplement (PMC10522653; doi:10.1038/s41408-023-00924-5), 2023-09-26
Supplement: 41408_2023_924_MOESM1_ESM.pdf [file 41408_2023_924_MOESM1_ESM.pdf]

**Supplementary Figure 1.** Kaplan-Meier survival curve showing 20-year event-free and overall survival of infants with acute lymphoblastic leukaemia treated in Australia and New Zealand between 1<sup>st</sup> January 1992 to 31<sup>st</sup> December 2011.

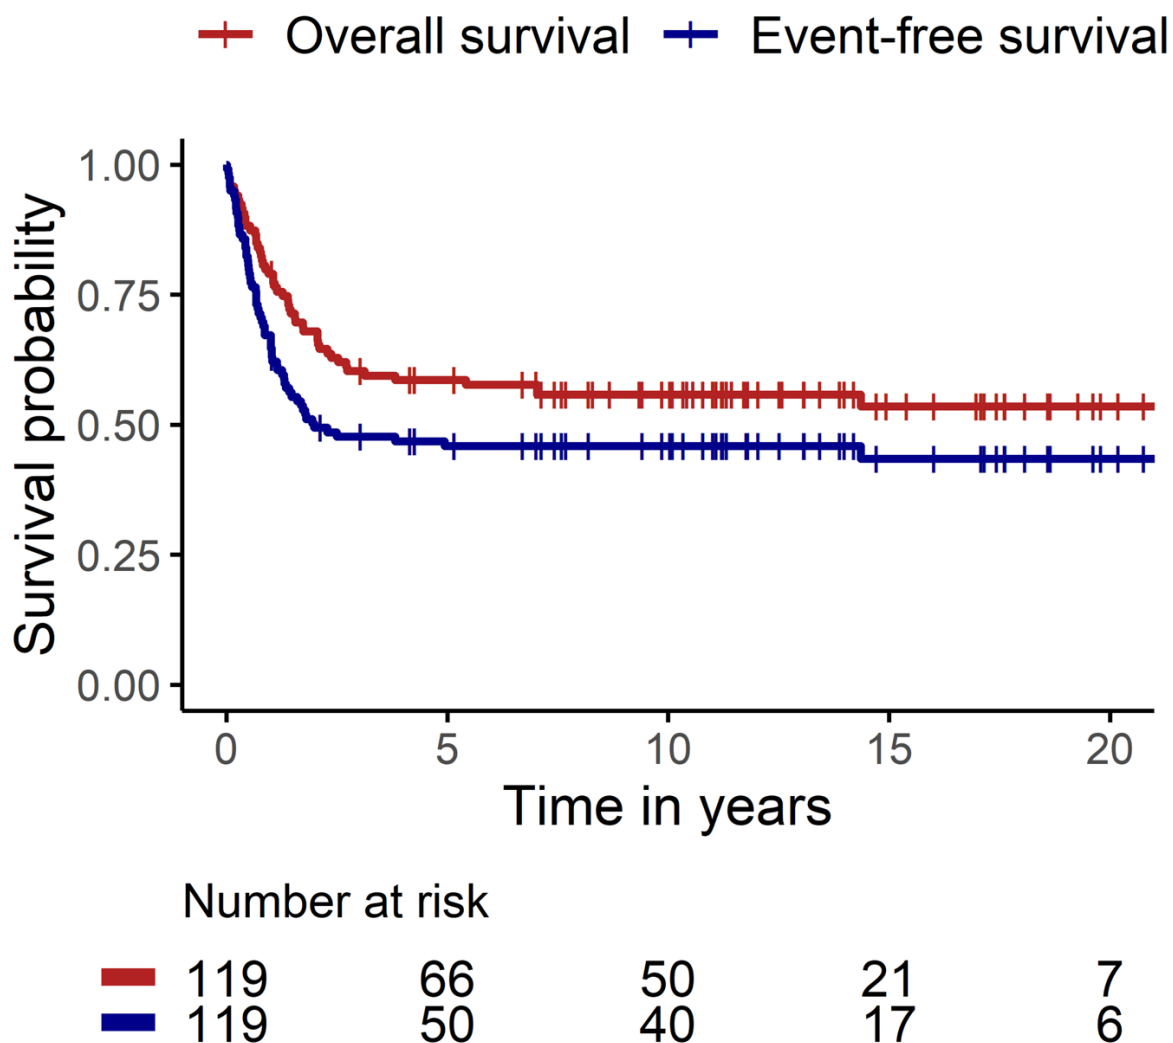

**Supplementary Figure 2.** Kaplan-Meier survival curves showing event-free (left panel) and overall survival (right panel) of infants with acute lymphoblastic leukaemia treated in Australia and New Zealand between 1<sup>st</sup> January 1992 to 31<sup>st</sup> December 2011 stratified by (A) *KMT2A* status (B) Sex (C) Age (D) CNS status (E) White Blood Cell count and (F) CD10 status at diagnosis.

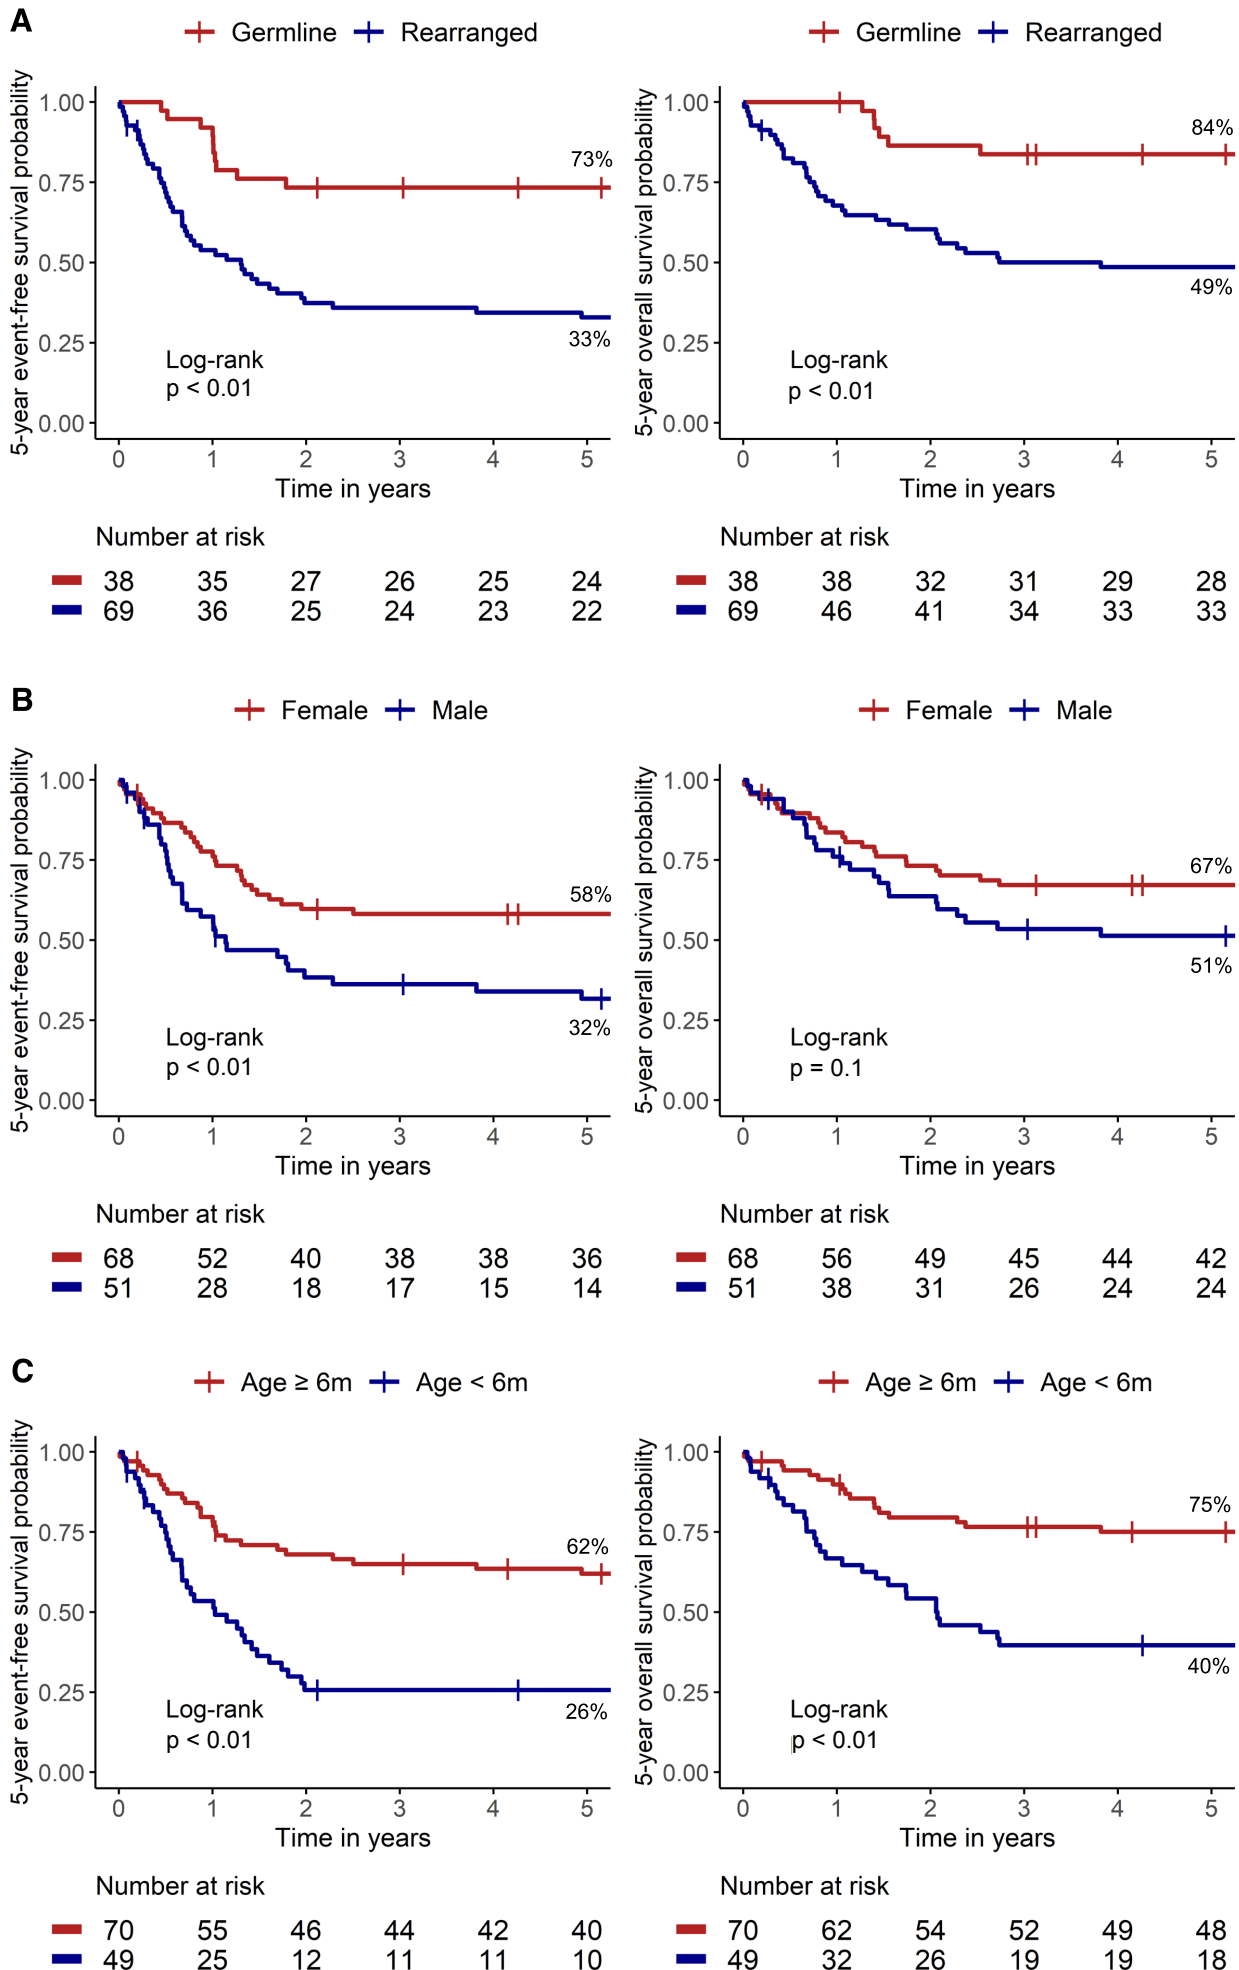

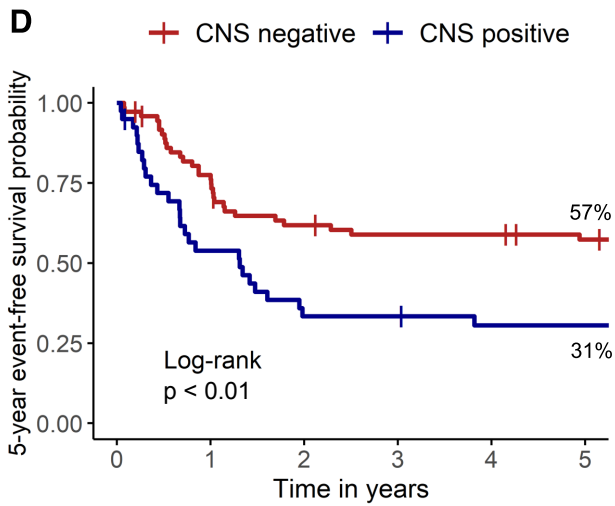

Number at risk

|    |    |    |    |    |    |
|----|----|----|----|----|----|
| 73 | 55 | 43 | 40 | 40 | 37 |
| 40 | 21 | 13 | 13 | 11 | 11 |

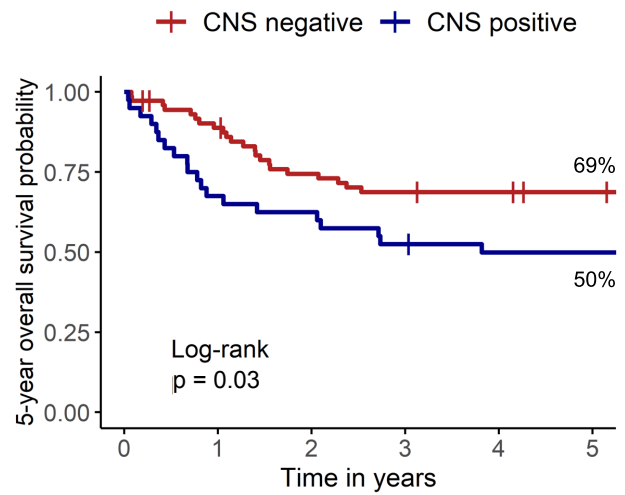

Number at risk

|    |    |    |    |    |    |
|----|----|----|----|----|----|
| 73 | 63 | 52 | 48 | 47 | 45 |
| 40 | 27 | 25 | 21 | 19 | 19 |

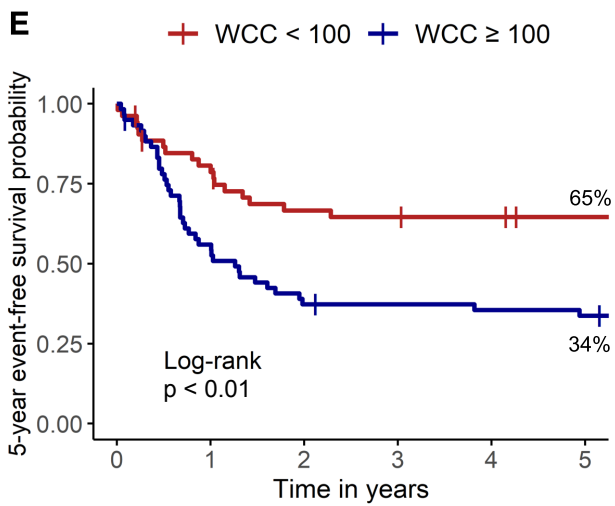

Number at risk

|    |    |    |    |    |    |
|----|----|----|----|----|----|
| 53 | 41 | 33 | 32 | 31 | 29 |
| 60 | 33 | 22 | 21 | 20 | 19 |

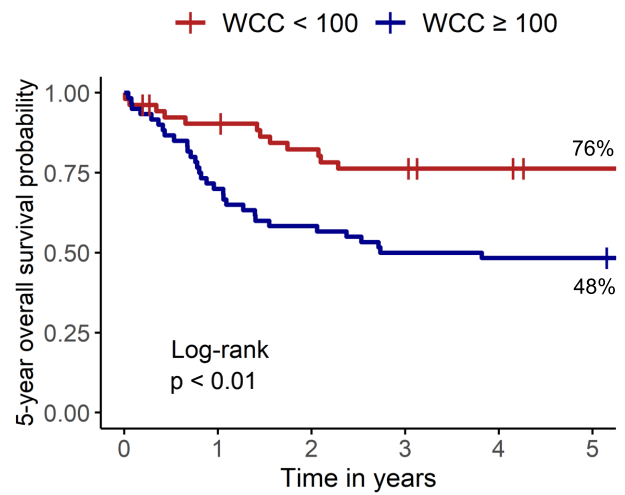

Number at risk

|    |    |    |    |    |    |
|----|----|----|----|----|----|
| 53 | 46 | 41 | 38 | 36 | 34 |
| 60 | 42 | 35 | 30 | 29 | 29 |

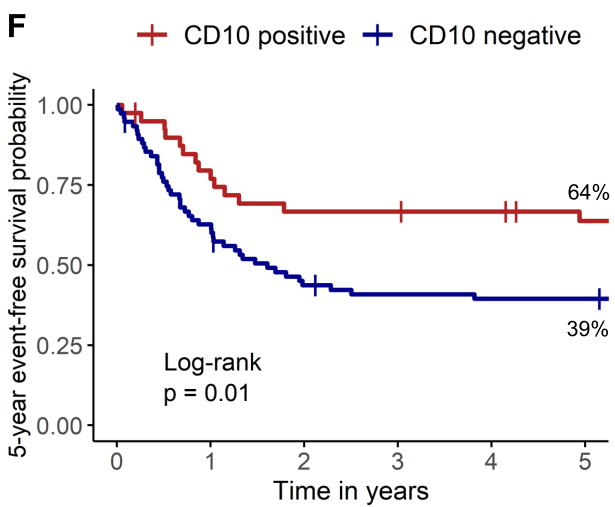

Number at risk

|    |    |    |    |    |    |
|----|----|----|----|----|----|
| 40 | 31 | 26 | 26 | 25 | 22 |
| 76 | 47 | 32 | 29 | 28 | 28 |

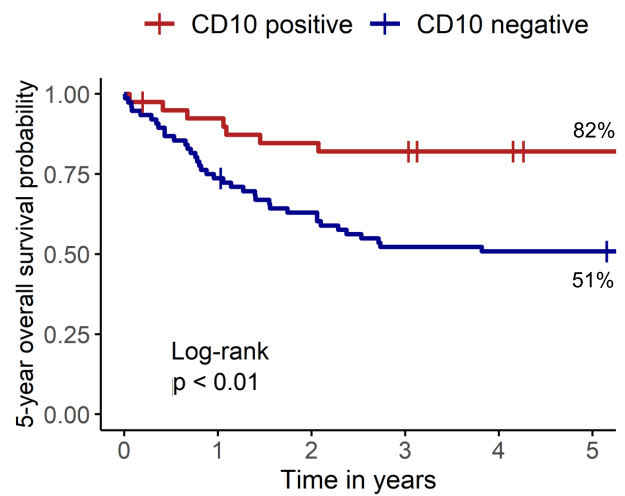

Number at risk

|    |    |    |    |    |    |
|----|----|----|----|----|----|
| 40 | 36 | 33 | 32 | 30 | 28 |
| 76 | 56 | 47 | 39 | 38 | 38 |
